# Supplementary material for: Analytical Validation of Clinical Whole-Genome and Transcriptome Sequencing of Patient-Derived Tumors for Reporting Targetable Variants in Cancer
Source: PubMed Central journal article supplement — J Mol Diagn. 2018 Nov;20(6):822–35. doi: 10.1016/j.jmoldx.2018.06.007 (PMC6198246; doi:10.1016/j.jmoldx.2018.06.007), 2018-11
Supplement: mmc8.pdf [file mmc8.pdf]

# Supplementary Figure 10

**A**

|                       | CA-0101T-D-W | CA-0101T-D-W-intra-R1 | CA-0101T-D-W-intra-R2 | CA-0101T-D-W-intra-R3 | CA-0101T-D-W-inter-R3 | CA-0122T-D-W | CA-0122T-D-W-intra-R1 | CA-0122T-D-W-intra-R2 | CA-0122T-D-W-intra-R3 | CA-0122T-D-W-inter-R3 | G15-35T-D | G15-35T-D-intra-R1 | G15-35T-D-intra-R2 | G15-35T-D-intra-R3 | G15-35T-D-inter-R3 | ONC16-13T-D-intra-R1 | ONC16-13T-D-intra-R2 | ONC16-13T-D-intra-R3 | ONC16-13T-D-inter-R3 | ONC16-13T-D |
|-----------------------|--------------|-----------------------|-----------------------|-----------------------|-----------------------|--------------|-----------------------|-----------------------|-----------------------|-----------------------|-----------|--------------------|--------------------|--------------------|--------------------|----------------------|----------------------|----------------------|----------------------|-------------|
| CA-0101T-D-W          | 100          | 99.8                  | 99.9                  | 99.9                  | 99.9                  | 39.5         | 39.4                  | 39.5                  | 39.5                  | 39.5                  | 40.9      | 40.9               | 40.9               | 40.9               | 40.9               | 40.1                 | 40.1                 | 40                   | 40.1                 | 40.1        |
| CA-0101T-D-W-intra-R1 | 99.8         | 100                   | 99.9                  | 99.9                  | 99.9                  | 39.5         | 39.3                  | 39.5                  | 39.5                  | 39.4                  | 40.8      | 40.8               | 40.8               | 40.8               | 40.8               | 40.1                 | 40.1                 | 40.1                 | 40.1                 | 40.1        |
| CA-0101T-D-W-intra-R2 | 99.9         | 99.9                  | 100                   | 99.9                  | 99.9                  | 39.5         | 39.4                  | 39.5                  | 39.5                  | 39.5                  | 40.8      | 40.9               | 40.9               | 40.9               | 40.8               | 40.1                 | 40.1                 | 40.1                 | 40.2                 | 40.1        |
| CA-0101T-D-W-intra-R3 | 99.9         | 99.9                  | 99.9                  | 100                   | 99.9                  | 39.5         | 39.4                  | 39.5                  | 39.5                  | 39.5                  | 40.8      | 40.8               | 40.9               | 40.8               | 40.8               | 40.1                 | 40.1                 | 40                   | 40.1                 | 40          |
| CA-0101T-D-W-inter-R3 | 99.9         | 99.9                  | 99.9                  | 99.9                  | 100                   | 39.6         | 39.4                  | 39.5                  | 39.5                  | 39.5                  | 40.8      | 40.9               | 40.9               | 40.9               | 40.9               | 40.1                 | 40.1                 | 40.1                 | 40.1                 | 40.1        |
| CA-0122T-D-W          | 39.5         | 39.5                  | 39.5                  | 39.5                  | 39.6                  | 100          | 99.6                  | 99.4                  | 99.5                  | 99.4                  | 39.1      | 39.1               | 39.1               | 39                 | 39.1               | 37.4                 | 37.4                 | 37.4                 | 37.3                 | 37.3        |
| CA-0122T-D-W-intra-R1 | 39.4         | 39.3                  | 39.4                  | 39.4                  | 39.4                  | 99.6         | 100                   | 99.5                  | 99.4                  | 99.4                  | 39        | 39.1               | 39                 | 39                 | 39                 | 37.3                 | 37.4                 | 37.3                 | 37.2                 | 37.3        |
| CA-0122T-D-W-intra-R2 | 39.5         | 39.5                  | 39.5                  | 39.5                  | 39.5                  | 99.4         | 99.5                  | 100                   | 99.3                  | 99.5                  | 39        | 39.1               | 39                 | 39                 | 39                 | 37.3                 | 37.4                 | 37.3                 | 37.3                 | 37.4        |
| CA-0122T-D-W-intra-R3 | 39.5         | 39.5                  | 39.5                  | 39.5                  | 39.5                  | 99.5         | 99.4                  | 99.3                  | 100                   | 99.3                  | 39        | 39                 | 39                 | 38.9               | 39                 | 37.4                 | 37.5                 | 37.4                 | 37.4                 | 37.5        |
| CA-0122T-D-W-inter-R3 | 39.5         | 39.4                  | 39.5                  | 39.5                  | 39.5                  | 99.4         | 99.4                  | 99.5                  | 99.3                  | 100                   | 39.1      | 39.1               | 39.1               | 39.1               | 39.1               | 37.3                 | 37.4                 | 37.3                 | 37.3                 | 37.4        |
| G15-35T-D             | 40.9         | 40.8                  | 40.8                  | 40.8                  | 40.8                  | 39.1         | 39                    | 39                    | 39                    | 39.1                  | 100       | 99.9               | 99.8               | 99.9               | 99.9               | 40.5                 | 40.6                 | 40.5                 | 40.6                 | 40.6        |
| G15-35T-D-intra-R1    | 40.9         | 40.8                  | 40.9                  | 40.8                  | 40.9                  | 39.1         | 39.1                  | 39.1                  | 39                    | 39.1                  | 99.9      | 100                | 99.9               | 99.9               | 99.9               | 40.5                 | 40.6                 | 40.5                 | 40.6                 | 40.5        |
| G15-35T-D-intra-R2    | 40.9         | 40.8                  | 40.9                  | 40.9                  | 40.9                  | 39.1         | 39                    | 39                    | 39                    | 39.1                  | 99.8      | 99.9               | 100                | 99.9               | 99.9               | 40.5                 | 40.6                 | 40.5                 | 40.6                 | 40.5        |
| G15-35T-D-intra-R3    | 40.9         | 40.8                  | 40.9                  | 40.8                  | 40.9                  | 39           | 39                    | 39                    | 38.9                  | 39.1                  | 99.9      | 99.9               | 99.9               | 100                | 99.9               | 40.5                 | 40.6                 | 40.5                 | 40.6                 | 40.5        |
| G15-35T-D-inter-R3    | 40.9         | 40.8                  | 40.8                  | 40.8                  | 40.9                  | 39.1         | 39                    | 39                    | 39                    | 39.1                  | 99.9      | 99.9               | 99.9               | 99.9               | 100                | 40.5                 | 40.6                 | 40.5                 | 40.6                 | 40.5        |
| ONC16-13T-D-intra-R1  | 40.1         | 40.1                  | 40.1                  | 40.1                  | 40.1                  | 37.4         | 37.3                  | 37.3                  | 37.4                  | 37.3                  | 40.5      | 40.5               | 40.5               | 40.5               | 40.5               | 100                  | 99.7                 | 99.8                 | 99.7                 | 99.6        |
| ONC16-13T-D-intra-R2  | 40.1         | 40.1                  | 40.1                  | 40.1                  | 40.1                  | 37.4         | 37.4                  | 37.4                  | 37.5                  | 37.4                  | 40.6      | 40.6               | 40.6               | 40.6               | 40.6               | 99.7                 | 100                  | 99.7                 | 99.7                 | 99.6        |
| ONC16-13T-D-intra-R3  | 40           | 40.1                  | 40.1                  | 40                    | 40.1                  | 37.4         | 37.3                  | 37.3                  | 37.4                  | 37.3                  | 40.5      | 40.5               | 40.5               | 40.5               | 40.5               | 99.8                 | 99.7                 | 100                  | 99.7                 | 99.7        |
| ONC16-13T-D-inter-R3  | 40.1         | 40.1                  | 40.2                  | 40.1                  | 40.1                  | 37.3         | 37.2                  | 37.3                  | 37.4                  | 37.3                  | 40.6      | 40.6               | 40.6               | 40.6               | 40.6               | 99.7                 | 99.7                 | 99.7                 | 100                  | 99.7        |
| ONC16-13T-D           | 40.1         | 40.1                  | 40.1                  | 40                    | 40.1                  | 37.3         | 37.3                  | 37.4                  | 37.5                  | 37.4                  | 40.6      | 40.5               | 40.5               | 40.5               | 40.5               | 99.6                 | 99.6                 | 99.7                 | 99.7                 | 100         |

# Supplementary Figure 10

**B**

|                       | CA-0101N-D-W | CA-0101N-D-W-intra-R1 | CA-0101N-D-W-intra-R2 | CA-0101N-D-W-intra-R3 | CA-0101N-D-W-inter-R3 | CA-0122N-D-W | CA-0122N-D-W-intra-R1 | CA-0122N-D-W-intra-R2 | CA-0122N-D-W-intra-R3 | CA-0122N-D-W-inter-R3 | G15-35N-D | G15-35N-D-intra-R1 | G15-35N-D-intra-R2 | G15-35N-D-intra-R3 | G15-35N-D-inter-R3 | ONC16-13N-D-intra-R1 | ONC16-13N-D-intra-R2 | ONC16-13N-D-intra-R3 | ONC16-13N-D-inter-R3 | ONC16-13N-D |
|-----------------------|--------------|-----------------------|-----------------------|-----------------------|-----------------------|--------------|-----------------------|-----------------------|-----------------------|-----------------------|-----------|--------------------|--------------------|--------------------|--------------------|----------------------|----------------------|----------------------|----------------------|-------------|
| CA-0101N-D-W          | 100          | 99.9                  | 99.9                  | 99.9                  | 99.9                  | 40.4         | 40.4                  | 40.4                  | 40.4                  | 40.4                  | 40.8      | 40.9               | 41                 | 40.9               | 40.9               | 40.1                 | 40.2                 | 40.2                 | 40.2                 | 40.2        |
| CA-0101N-D-W-intra-R1 | 99.9         | 100                   | 99.9                  | 99.9                  | 99.9                  | 40.3         | 40.3                  | 40.3                  | 40.3                  | 40.3                  | 40.8      | 40.9               | 40.9               | 40.8               | 40.8               | 40.1                 | 40.2                 | 40.1                 | 40.1                 | 40.1        |
| CA-0101N-D-W-intra-R2 | 99.9         | 99.9                  | 100                   | 99.9                  | 99.9                  | 40.3         | 40.3                  | 40.4                  | 40.4                  | 40.3                  | 40.8      | 40.9               | 40.9               | 40.9               | 40.9               | 40.2                 | 40.2                 | 40.2                 | 40.2                 | 40.2        |
| CA-0101N-D-W-intra-R3 | 99.9         | 99.9                  | 99.9                  | 100                   | 99.9                  | 40.3         | 40.4                  | 40.4                  | 40.4                  | 40.4                  | 40.8      | 40.9               | 40.9               | 40.9               | 40.9               | 40.1                 | 40.2                 | 40.2                 | 40.1                 | 40.2        |
| CA-0101N-D-W-inter-R3 | 99.9         | 99.9                  | 99.9                  | 99.9                  | 100                   | 40.3         | 40.3                  | 40.3                  | 40.4                  | 40.4                  | 40.8      | 40.8               | 40.9               | 40.8               | 40.8               | 40.1                 | 40.2                 | 40.1                 | 40.1                 | 40.1        |
| CA-0122N-D-W          | 40.4         | 40.3                  | 40.3                  | 40.3                  | 40.3                  | 100          | 99.9                  | 99.9                  | 99.9                  | 99.9                  | 41.3      | 41.3               | 41.3               | 41.4               | 41.3               | 38.8                 | 38.9                 | 38.9                 | 39                   | 38.9        |
| CA-0122N-D-W-intra-R1 | 40.4         | 40.3                  | 40.3                  | 40.4                  | 40.3                  | 99.9         | 100                   | 99.9                  | 99.9                  | 99.9                  | 41.4      | 41.3               | 41.3               | 41.3               | 41.4               | 38.8                 | 38.9                 | 38.9                 | 38.9                 | 38.9        |
| CA-0122N-D-W-intra-R2 | 40.4         | 40.3                  | 40.4                  | 40.4                  | 40.3                  | 99.9         | 99.9                  | 100                   | 99.9                  | 99.8                  | 41.3      | 41.3               | 41.3               | 41.3               | 41.3               | 38.9                 | 39                   | 38.9                 | 39                   | 39          |
| CA-0122N-D-W-intra-R3 | 40.4         | 40.3                  | 40.4                  | 40.4                  | 40.4                  | 99.9         | 99.9                  | 99.9                  | 100                   | 99.9                  | 41.3      | 41.3               | 41.3               | 41.3               | 41.3               | 38.9                 | 39                   | 38.9                 | 39                   | 39          |
| CA-0122N-D-W-inter-R3 | 40.4         | 40.3                  | 40.3                  | 40.4                  | 40.4                  | 99.9         | 99.9                  | 99.8                  | 99.9                  | 100                   | 41.3      | 41.3               | 41.3               | 41.3               | 41.3               | 38.8                 | 38.9                 | 38.9                 | 39                   | 38.9        |
| G15-35N-D             | 40.8         | 40.8                  | 40.8                  | 40.8                  | 40.8                  | 41.3         | 41.4                  | 41.3                  | 41.3                  | 41.3                  | 100       | 99.8               | 99.8               | 99.8               | 99.9               | 40.7                 | 40.7                 | 40.7                 | 40.7                 | 40.7        |
| G15-35N-D-intra-R1    | 40.9         | 40.9                  | 40.9                  | 40.9                  | 40.8                  | 41.3         | 41.3                  | 41.3                  | 41.3                  | 41.3                  | 99.8      | 100                | 99.8               | 99.8               | 99.9               | 40.7                 | 40.7                 | 40.6                 | 40.7                 | 40.7        |
| G15-35N-D-intra-R2    | 41           | 40.9                  | 40.9                  | 40.9                  | 40.9                  | 41.3         | 41.3                  | 41.3                  | 41.3                  | 41.3                  | 99.8      | 99.8               | 100                | 99.8               | 99.9               | 40.7                 | 40.7                 | 40.7                 | 40.7                 | 40.7        |
| G15-35N-D-intra-R3    | 40.9         | 40.8                  | 40.9                  | 40.9                  | 40.8                  | 41.4         | 41.3                  | 41.3                  | 41.3                  | 41.3                  | 99.8      | 99.8               | 99.8               | 100                | 99.9               | 40.7                 | 40.7                 | 40.6                 | 40.6                 | 40.6        |
| G15-35N-D-inter-R3    | 40.9         | 40.8                  | 40.9                  | 40.9                  | 40.8                  | 41.3         | 41.4                  | 41.3                  | 41.3                  | 41.3                  | 99.9      | 99.9               | 99.9               | 99.9               | 100                | 40.7                 | 40.7                 | 40.7                 | 40.7                 | 40.7        |
| ONC16-13N-D-intra-R1  | 40.1         | 40.1                  | 40.2                  | 40.1                  | 40.1                  | 38.8         | 38.8                  | 38.9                  | 38.9                  | 38.8                  | 40.7      | 40.7               | 40.7               | 40.7               | 40.7               | 100                  | 99.8                 | 99.8                 | 99.8                 | 99.9        |
| ONC16-13N-D-intra-R2  | 40.2         | 40.2                  | 40.2                  | 40.2                  | 40.2                  | 38.9         | 38.9                  | 39                    | 39                    | 38.9                  | 40.7      | 40.7               | 40.7               | 40.7               | 40.7               | 99.8                 | 100                  | 100                  | 99.8                 | 99.9        |
| ONC16-13N-D-intra-R3  | 40.2         | 40.1                  | 40.2                  | 40.2                  | 40.1                  | 38.9         | 38.9                  | 38.9                  | 38.9                  | 38.9                  | 40.7      | 40.6               | 40.7               | 40.6               | 40.7               | 99.8                 | 100                  | 100                  | 99.8                 | 100         |
| ONC16-13N-D-inter-R3  | 40.2         | 40.1                  | 40.2                  | 40.1                  | 40.1                  | 39           | 38.9                  | 39                    | 39                    | 39                    | 40.7      | 40.7               | 40.7               | 40.6               | 40.7               | 99.8                 | 99.8                 | 99.8                 | 100                  | 99.9        |
| ONC16-13N-D           | 40.2         | 40.1                  | 40.2                  | 40.2                  | 40.1                  | 38.9         | 38.9                  | 39                    | 39                    | 38.9                  | 40.7      | 40.7               | 40.7               | 40.6               | 40.7               | 99.9                 | 99.9                 | 100                  | 99.9                 | 100         |
