# Supplementary figures and images for: Analytical Validation of Clinical Whole-Genome and Transcriptome Sequencing of Patient-Derived Tumors for Reporting Targetable Variants in Cancer
Source: PubMed Central journal article supplement — J Mol Diagn. 2018 Nov;20(6):822–35. doi: 10.1016/j.jmoldx.2018.06.007 (PMC6198246; doi:10.1016/j.jmoldx.2018.06.007), 2018-11

Supplementary Figure 2

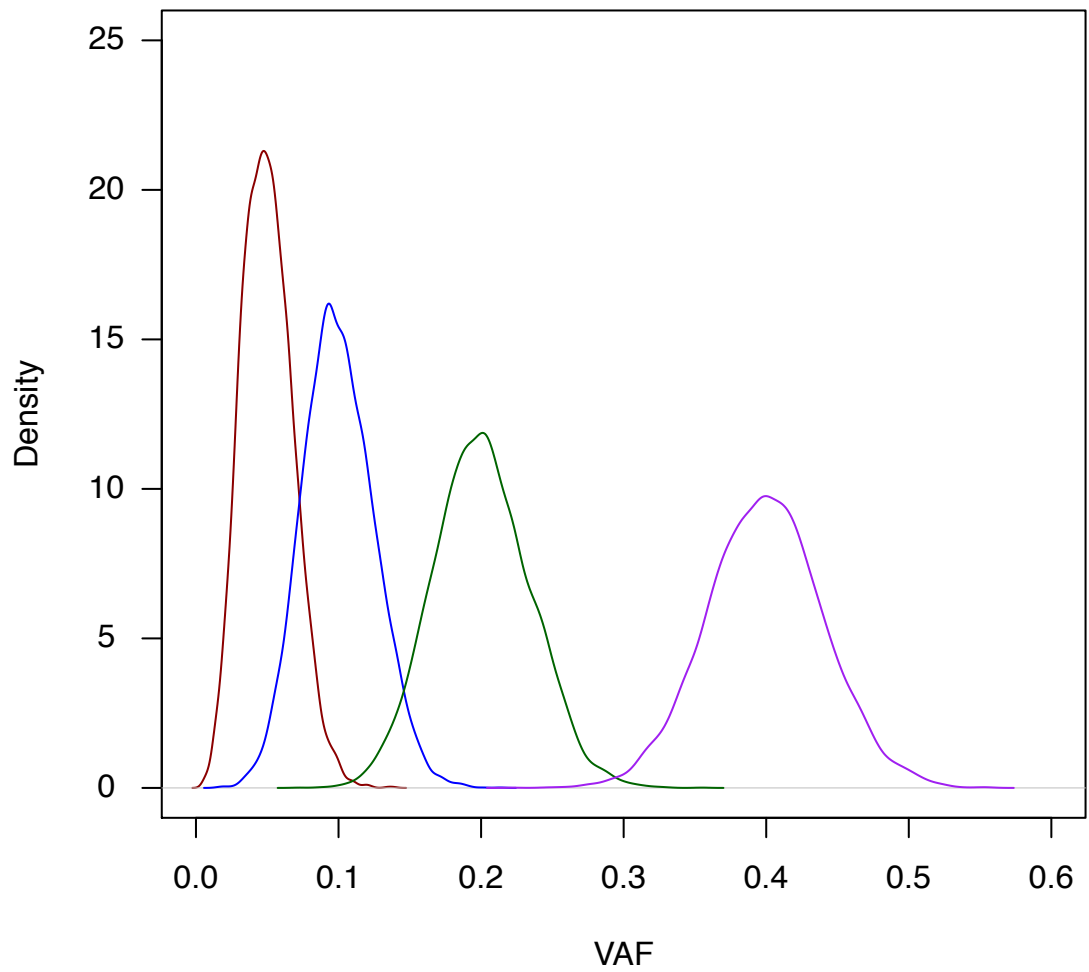

Supplement: mmc2.pdf [file mmc2.pdf]

Supplementary Figure 5

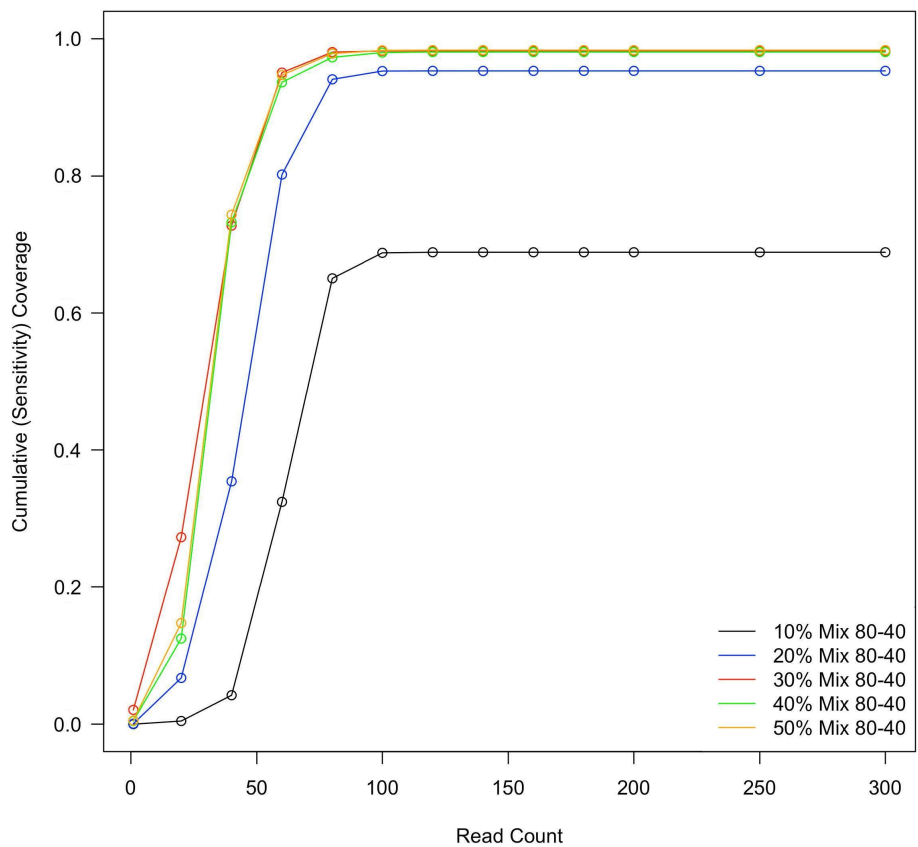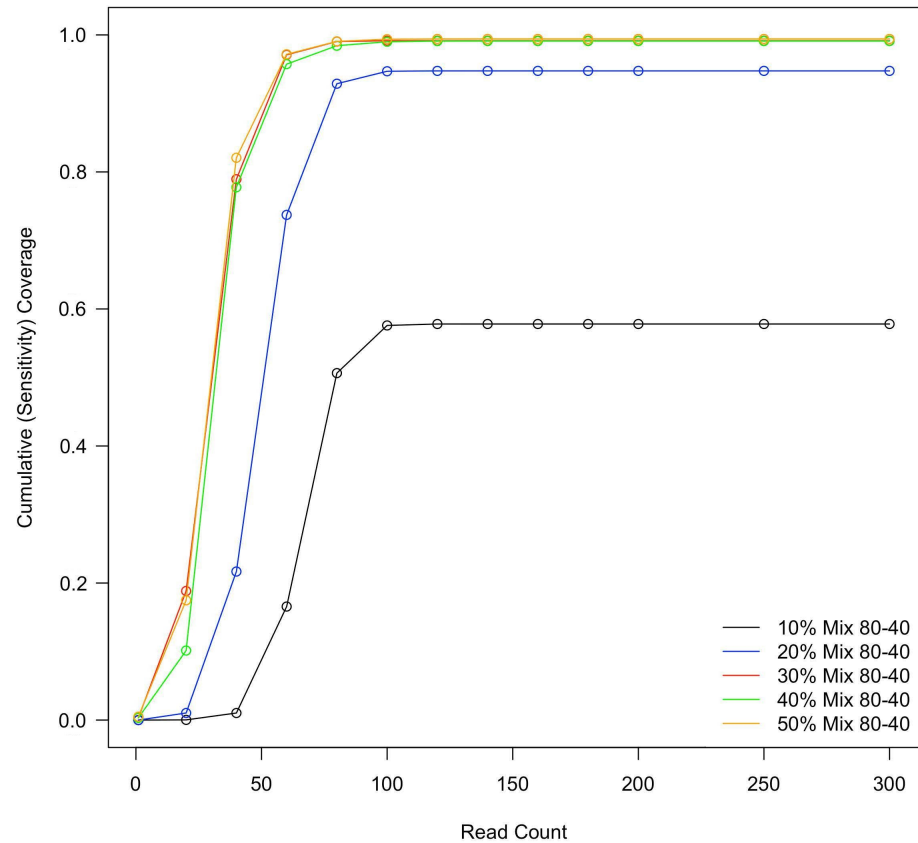

Supplement: mmc5.pdf [file mmc5.pdf]

# Supplementary Figure 6

**A**

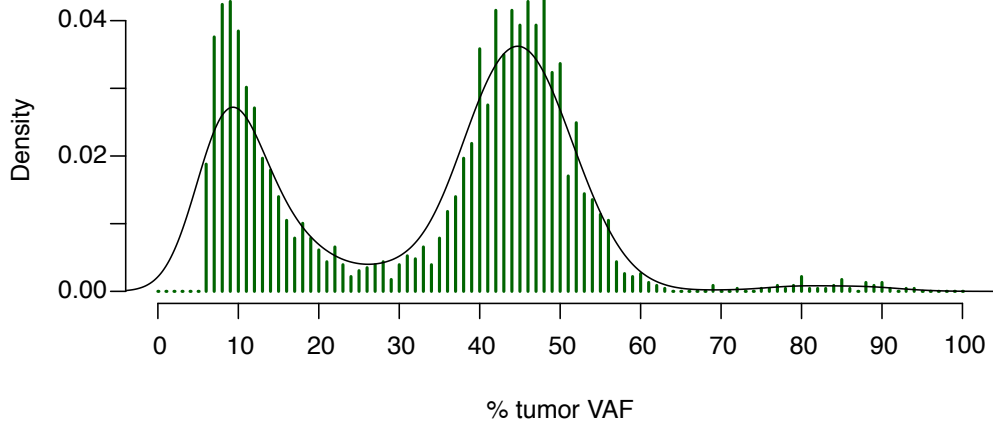

**B**

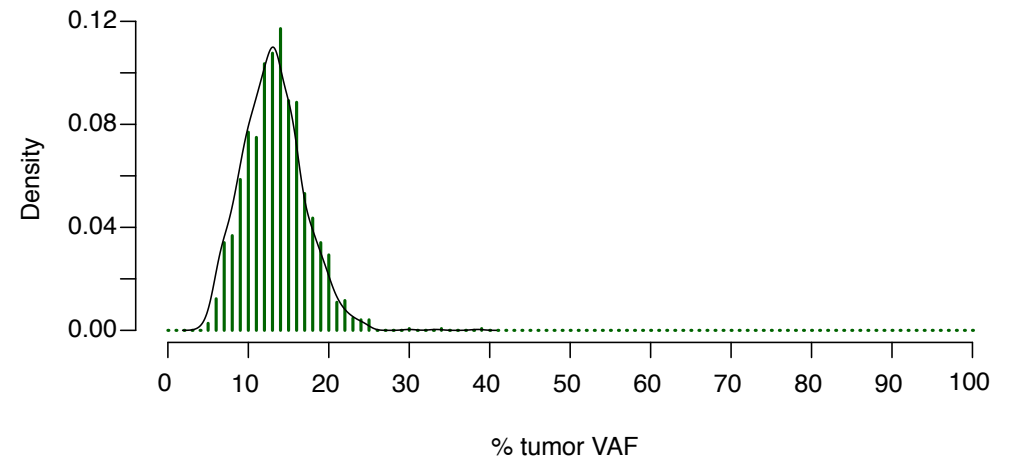

**C**

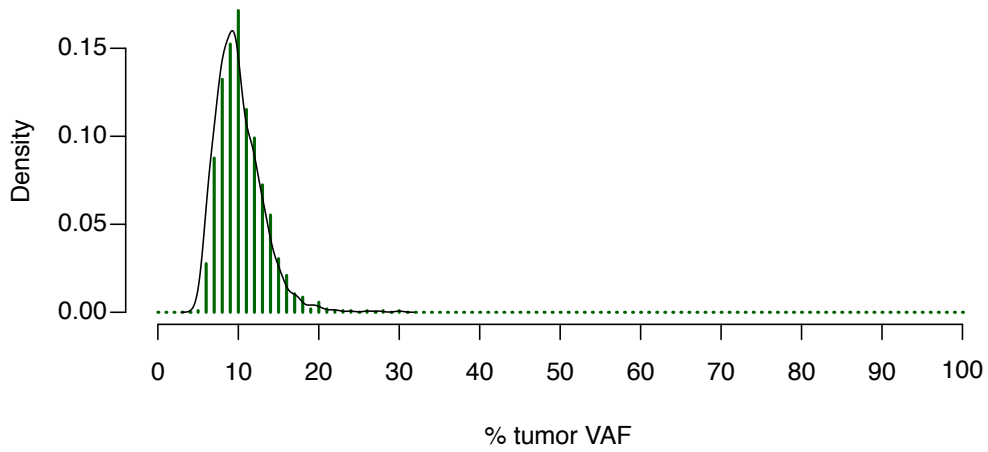

**D**

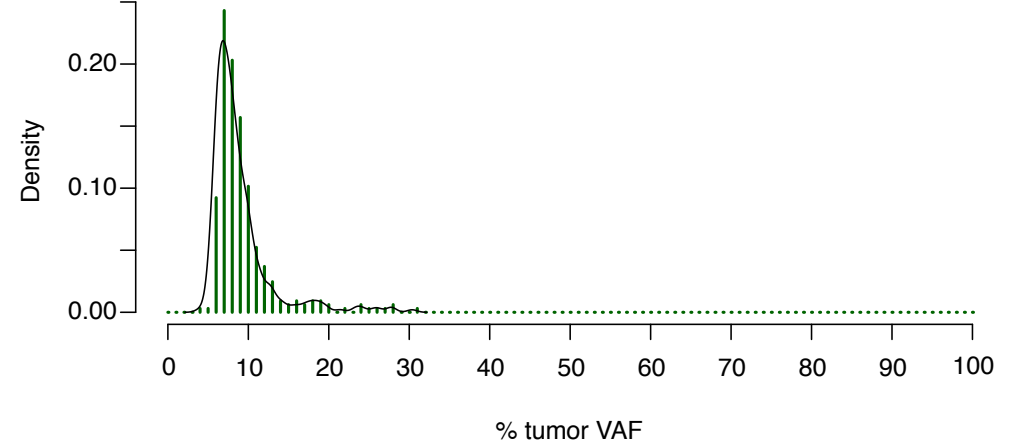

Supplement: mmc6.pdf [file mmc6.pdf]

Supplementary Figure 7

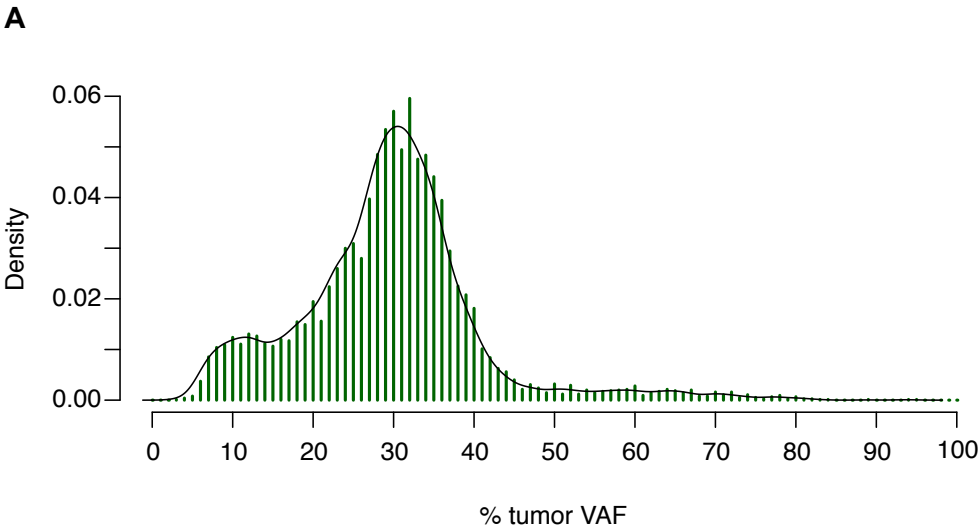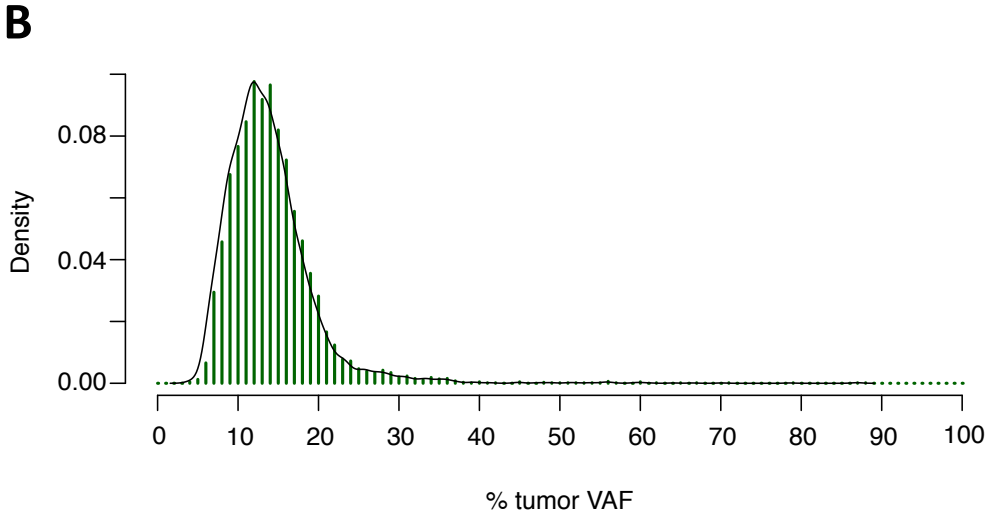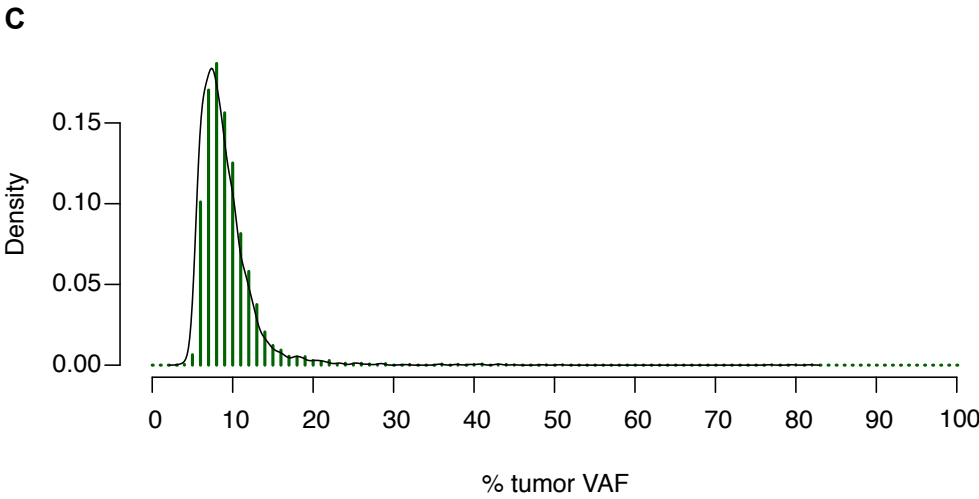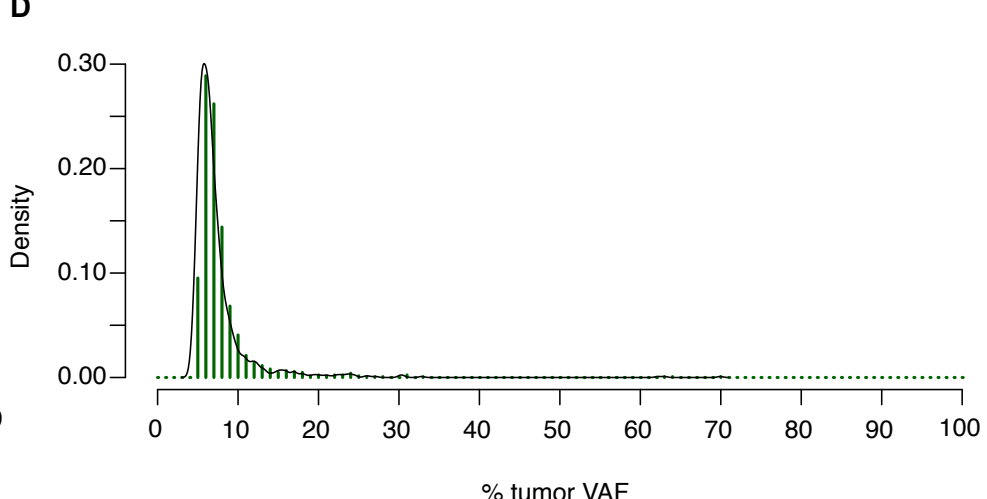

Supplement: mmc7.pdf [file mmc7.pdf]
